# Supplementary material for: Influence of Ambient Atmospheric Environments on the Mixing State and Source of Oxalate-Containing Particles at Coastal and Suburban Sites in North China
Source: MDPI journal article supplement (doi:10.3390/atmos13050647), 2022-04-20
Supplement: s1 [file s1]

# Supplementary Materials: Influence of ambient atmospheric environments on the mixing state and source of oxalate-containing particles at coastal and suburban sites in North China

Yunhui Zhao <sup>1</sup>, Yanjing Zhang <sup>1</sup>, Xiaodong Li <sup>1</sup>, Lei Li <sup>2,\*</sup>, Limin Feng <sup>3</sup>, Huan Xie <sup>3</sup>, Wenshuai Li <sup>1</sup>, Xiaohuan Liu <sup>3</sup>, Yujiao Zhu <sup>4</sup>, Lifang Sheng <sup>1</sup>, Jianhua Qi <sup>3</sup>, Huiwang Gao <sup>3</sup>, Zhen Zhou <sup>2</sup> and Yang Zhou <sup>1,\*</sup>

<sup>1</sup> Key Laboratory of Physical Oceanography, College of Oceanic and Atmospheric Sciences, Ocean University of China, Qingdao 266100, China; zhaoyunhui@stu.ouc.edu.cn (Y.Z.); zyj9733@stu.ouc.edu.cn (Y.Z.); lixiaodong1819@126.com (X.L.); lws@stu.ouc.edu.cn (W.L.); shenglf@ouc.edu.cn (L.S.)

<sup>2</sup> Guangdong Provincial Engineering Research Center for On-Line Source Apportionment System of Air Pollution, Institute of Mass Spectrometry and Atmospheric Environment, Jinan University, Guangzhou 510632, China; zhouzhen@gig.ac.cn

<sup>3</sup> Key Lab of Marine Environmental Science and Ecology, Ministry of Education, Ocean University of China, Qingdao 266100, China; flmfenglimin@163.com (L.F.); xh19930517@126.com (H.X.); liuxh1983@ouc.edu.cn (X.L.); qjianhua@ouc.edu.cn (J.Q.); hwgao@ouc.edu.cn (H.G.)

<sup>4</sup> Environment Research Institute, Shandong University, Qingdao 266237, China; zhuyujiao@sdu.edu.cn

\* Correspondence: lileishdx@163.com (L.L.) and yangzhou@ouc.edu.cn (Y.Z.)

**Table S1.** Classified groups of oxalate particles for marine and continental air mass at LQH and OUC.

| Groups       | LQH_M <sup>1</sup> |          | LQH_C <sup>1</sup> |          | OUC_M <sup>1</sup> |          | OUC_C <sup>1</sup> |          |
|--------------|--------------------|----------|--------------------|----------|--------------------|----------|--------------------|----------|
|              | Number             | Fraction | Number             | Fraction | Number             | Fraction | Number             | Fraction |
| K-rich       | 1305               | 25.4%    | 12,202             | 32.9%    | 4869               | 22.4%    | 65,485             | 34.6%    |
| K-ECOC       | 1230               | 23.9%    | 9848               | 26.6%    | 7238               | 33.3%    | 53,372             | 28.2%    |
| K-Na         | 495                | 6.6%     | 4036               | 10.9%    | 827                | 3.8%     | 20,382             | 10.8%    |
| EC           | 191                | 3.7%     | 2889               | 7.8%     | 2516               | 11.6%    | 18,447             | 9.7%     |
| EC-Na        | 84                 | 1.6%     | 1388               | 3.7%     | 478                | 2.2%     | 10,660             | 5.6%     |
| ECOC         | 50                 | 1.0%     | 1127               | 3.0%     | 411                | 1.9%     | 2975               | 1.6%     |
| Fe-rich      | 971                | 18.9%    | 2754               | 7.4%     | 2711               | 12.5%    | 9272               | 4.9%     |
| V-rich       | 154                | 3.0%     | 634                | 1.7%     | 1384               | 6.4%     | 1378               | 0.7%     |
| Pb-rich      | 110                | 2.1%     | 550                | 1.5%     | 294                | 1.4%     | 1224               | 0.6%     |
| Zn-rich      | 2                  | 0.0%     | 239                | 0.6%     | 13                 | 0.1%     | 353                | 0.2%     |
| Cu-rich      | 31                 | 0.6%     | 174                | 0.5%     | 157                | 0.7%     | 1789               | 0.9%     |
| Other metals | 118                | 2.3%     | 390                | 1.1%     | 233                | 1.1%     | 922                | 0.5%     |
| Undefined    | 395                | 7.7%     | 859                | 2.3%     | 591                | 2.7%     | 3199               | 1.7%     |
| Oxalate      | 5136               | 1.4%     | 37,090             | 12.4%    | 21,722             | 7.2%     | 189,458            | 13.4%    |
| mass         | 371,220            | 100.0%   | 299,667            | 100.0%   | 300,634            | 100.0%   | 1,418,144          | 100.0%   |

<sup>1</sup> M means under the control of marine air mass and C means under the control of continental air mass.

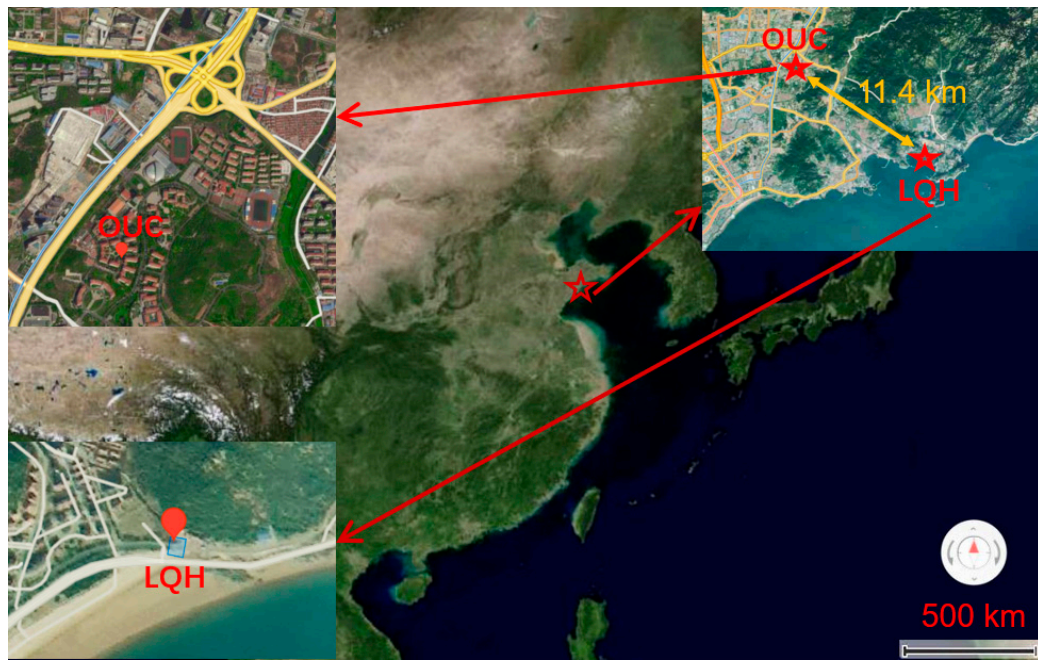

Figure S1. The location of the two observation sites.

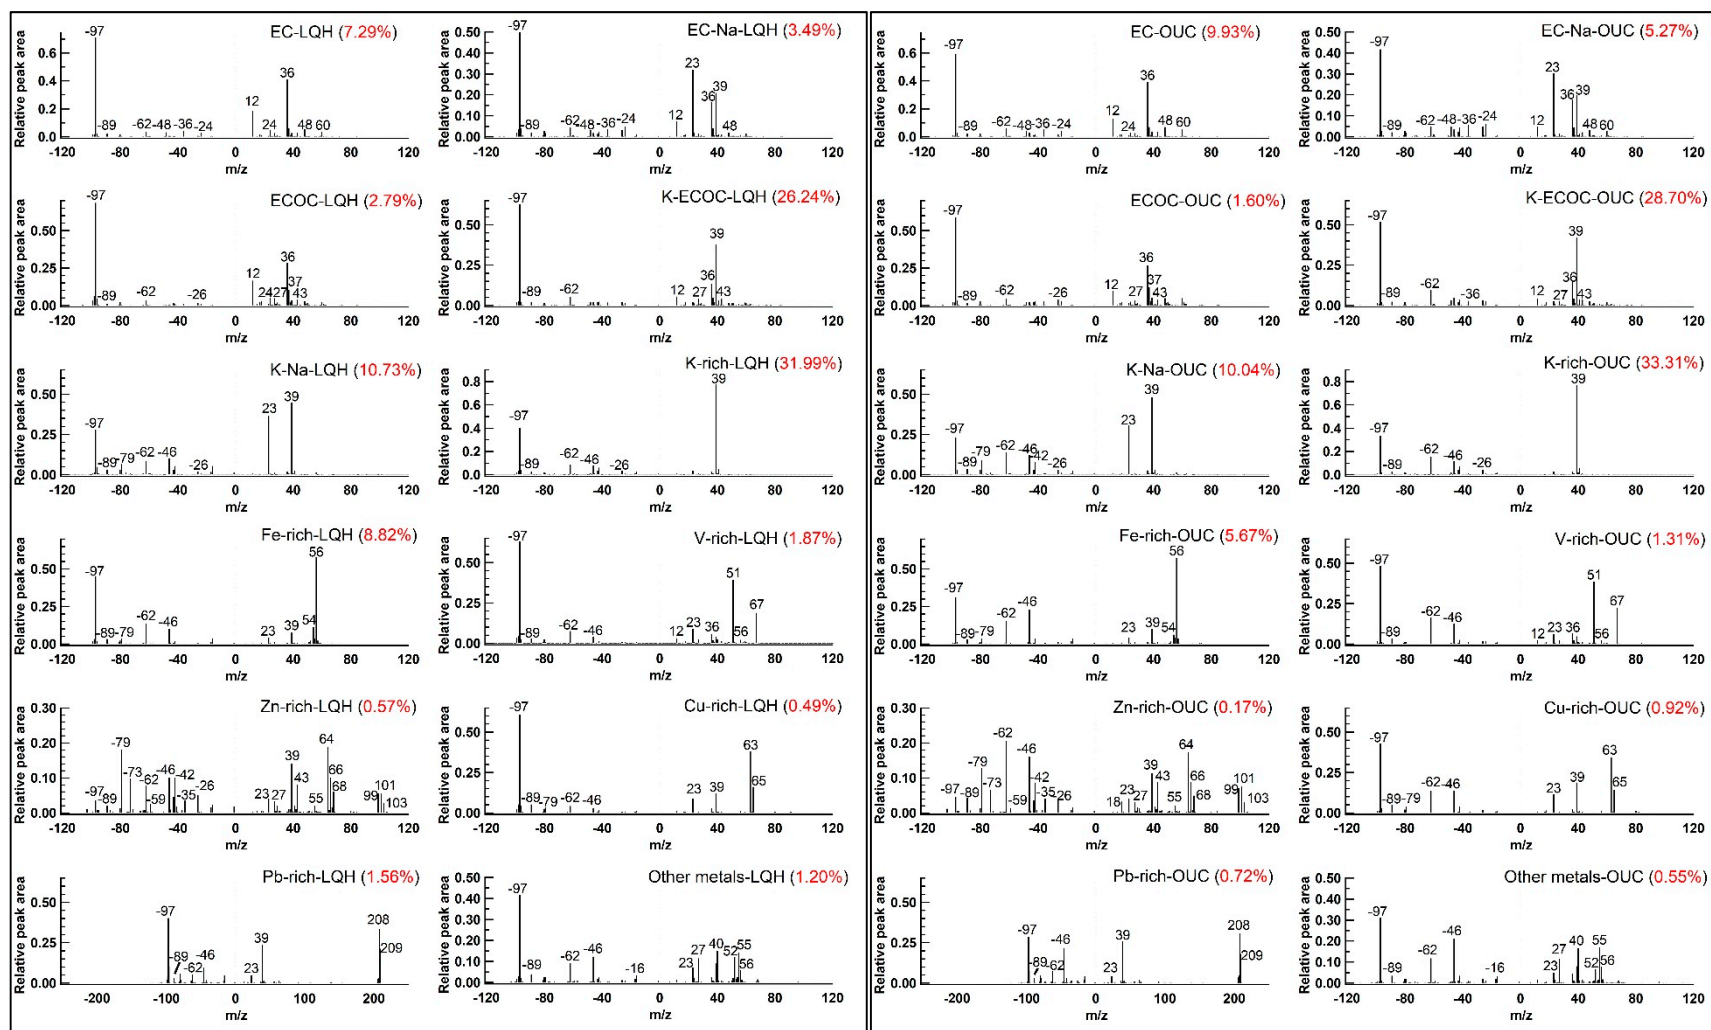

**Figure S2.** Average mass spectra of 12 major oxalate-containing particle types classified using the Art-2a clustering algorithm.





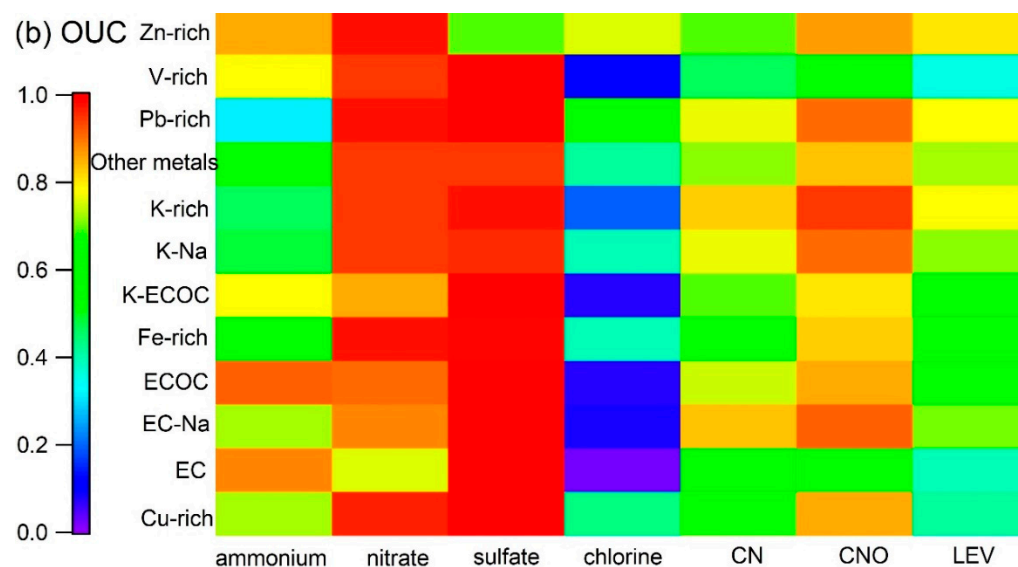

**Figure S4.** Number fraction of selected ion markers associated with single particle types at (a) LQH and (b) OUC.

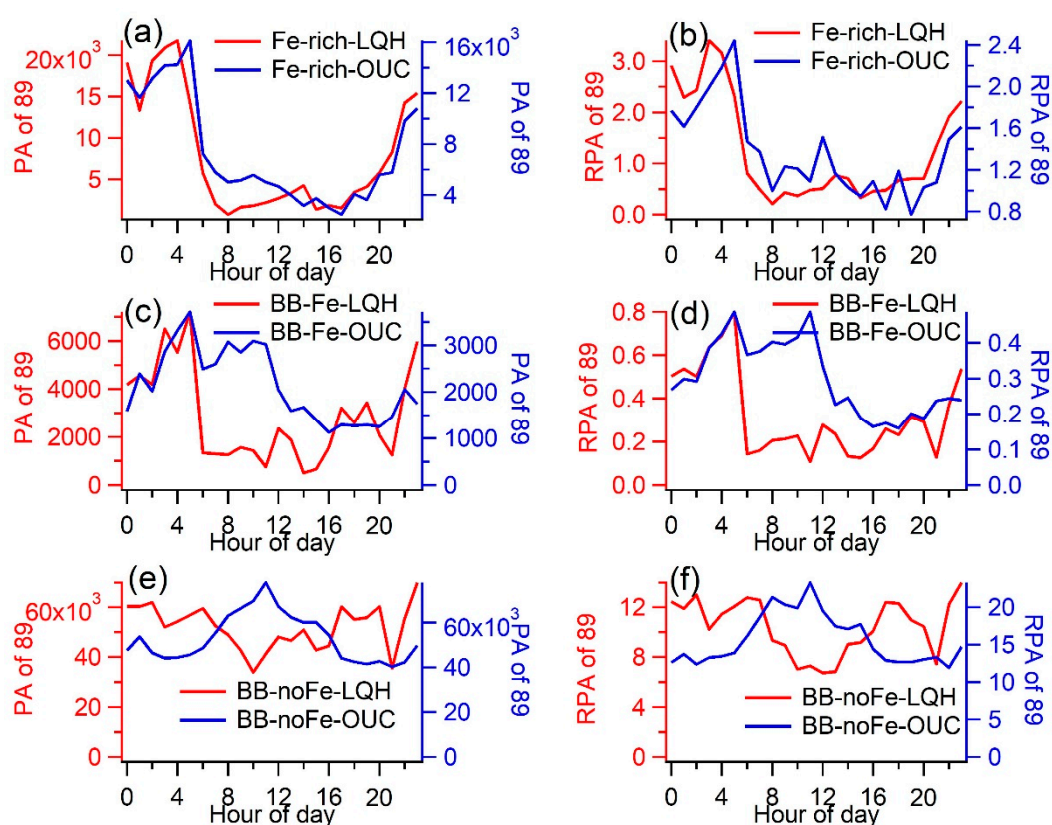

**Figure S5.** Diurnal variations of oxalate ( $m/z$  -89) PA (a), and RPA (b) in Fe-rich particles and oxalate ( $m/z$  -89) PA (c), and RPA (d) in BB-Fe particles and oxalate ( $m/z$  -89) PA (e), and RPA (f) in BB-noFe particles.

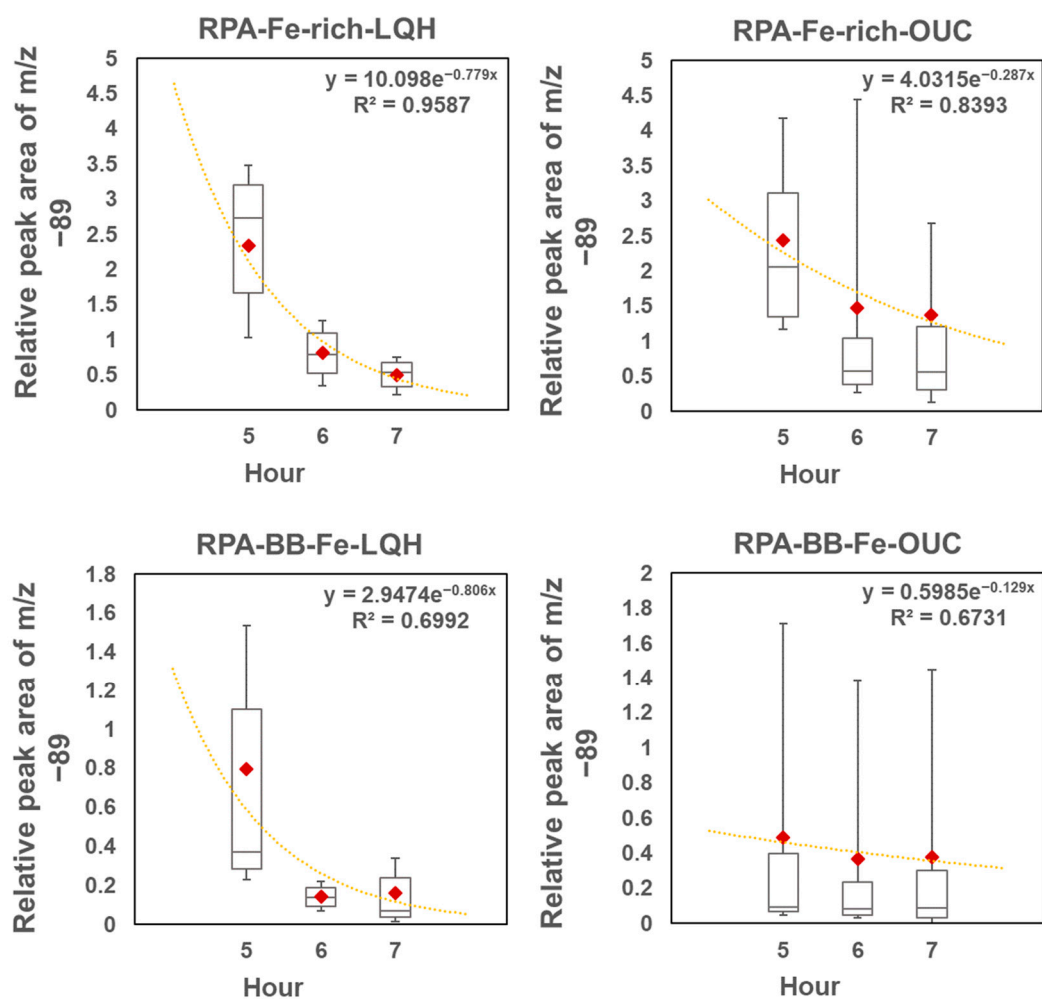

**Figure S6.** Average decay estimation of oxalate intensity in different oxalate-Fe complexes. (Plotted by particle RPA of m/z -89; box and error bars represent the 10th, 25th, 50th, 75th, and 90th percentiles; and the red diamond represents the mean).

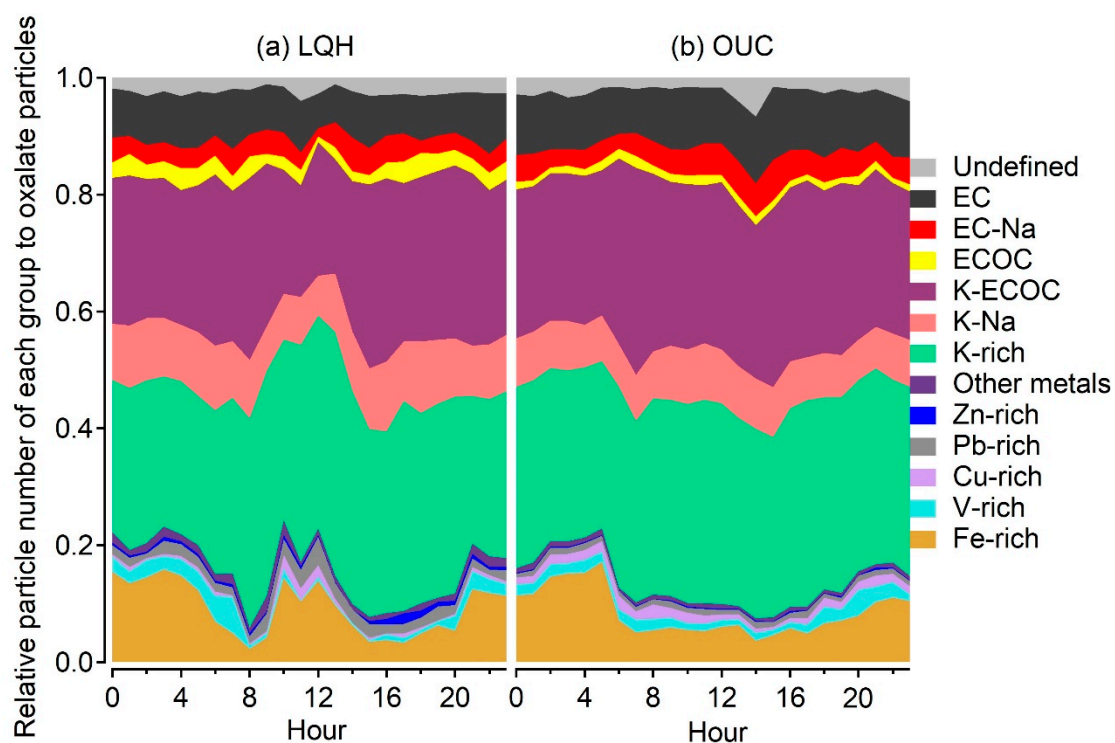

**Figure S7.** Average diurnal variation in classified oxalate groups (contribution of relative particle number from each classified group to that of the total oxalate particles) at (a) LQH and (b) OUC.

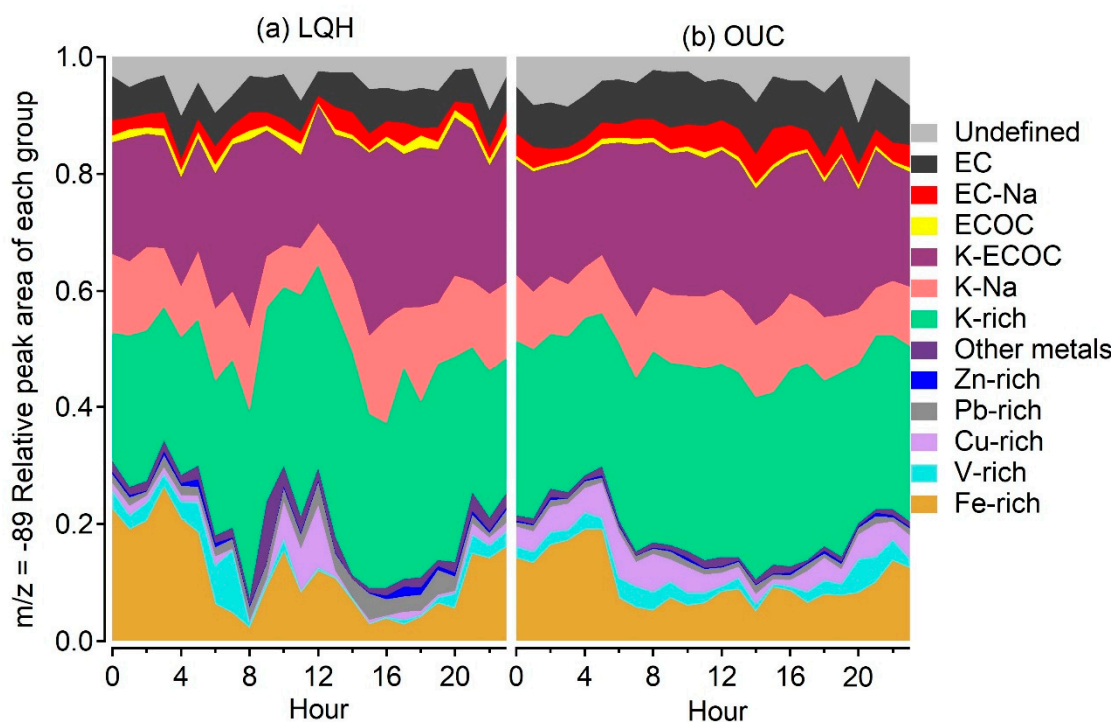

**Figure S8.** Average diurnal variation in classified oxalate groups (contribution of m/z -89 RPA from each classified group to that of the total oxalate particles) at (a) LQH and (b) OUC.
